# Supplementary material for: Nine genera of Eucnemidae (Coleoptera) new to Peru, with a key to Peruvian genera
Source: Biodivers Data J. 2015 Mar 11;(3):e4493. doi: 10.3897/BDJ.3.e4493 (PMC4366809; doi:10.3897/BDJ.3.e4493)
Supplement: Supplementary material 2 — Eucnemid specimens by traps [file biodiversity_data_journal-3-e4493-s002.xlsx]

## Sheet: Basic Metadata
Basic Metadata
Title	Nine genera of Eucnemidae (Coleoptera) new to Peru, with a key to Peruvian genera
Expected citation	Vahtera V, Muona J, Linna A, Sääksjärvi IE (2015) Nine genera of Eucnemidae (Coleoptera) new to Peru, with a key to Peruvian genera. Biodiversity Data Journal.
Abstract	Thirteen genera of Eucnemidae containing forty species were collected from the Iquitos region in Peru. Nine of the genera are new to the country:
	Rhagomicrus Fleutiaux, 1902, Adelorhagus Horn, 1890, Adelothyreus Chevrolat, 1867, Microrhagus Dejean, 1833, Dyscharachthis Blackburn, 1900,
	Heterotaxis Bonvouloir, 1871, Spinifornax Fleutiaux, 1926, Serrifornax Fleutiaux, 1926 and Maelodrus Fleutiaux, 1928.
	The previous eucnemid record from Peru contained eleven species in ten genera. Only one of the forty species caught, Entomophthalmus americanus Bonvouloir, was previously known and
	described from the country. Dyscharachthis, Maelodrus and Adelorhagus are recorded from South America for the first time. Many of the collected species seem to favor white-sand forest as their habitat.
	Possible reasons for this are discussed. A list of eucnemids from Peru is included, containing taxa already recorded from the country and also taxa that are likely to occur there.
	A key to the Peruvian genera is included.
Language	English
People and Organizations
	First name	Last name	Organization	Phone	Email	Address	City	Country	Postal Code	Primary Contact
Resource creator	Varpu	Vahtera	University of Turku	35823335048	varpu.vahtera@utu.fi	Zoological Museum, University of Turku	Turku	Finland	FI-20014	Yes
Metadata Author	Varpu	Vahtera	University of Turku	35823335048	varpu.vahtera@utu.fi	Zoological Museum, University of Turku	Turku	Finland	FI-20014	Yes
Keywords and Coverage
General Keywords	Neotropics, Amazon, Elateroidea, eucnemid, lowland, rain forest, white-sand forest, taxonomy, species richness
Taxonomic Keywords	Coleoptera, Eucnemidae

## Sheet: Eucnemid specimens by traps
	Clayey soil	Clayey soil	White-sand	White-sand	White-sand	Clayey soil	Clayey soil	White-sand	White-sand	White-sand	White-sand	White-sand	White-sand	Clayey soil	White-sand	White-sand	White-sand	Clayey soil	Clayey soil	White-sand	White-sand	White-sand	Clayey soil	Clayey soil	Number of specimens in total
	Trap code	Trap code	Trap code	Trap code	Trap code	Trap code	Trap code	Trap code	Trap code	Trap code	Trap code	Trap code	Trap code	Trap code	Trap code	Trap code	Trap code	Trap code	Trap code	Trap code	Trap code	Trap code
Species	A1	A2	B1	B2	B3	C1	C2	D1	D2	D3	E1	E2	E3	F1	G1	G2	G3	H1	H2	I1	I2	I3	J1	J2
Adelorhagus sp. 1		1																						1	2
Adelothyreus sp. 1								1																	1
Idiotarsus sp. 1			2		2						1														5
Idiotarsus sp. 2	1	2	1	2	2			1		1						1	1	1							13
Entomopthalmus sp. 1		1														1									2
Entomopthalmus americanus			4	2	1	4	3	4	7				1		1			3		1		2	1	4	38
Fornax sp. 1			1					1	1								1								4
Fornax sp. 2			2		1																				3
Fornax sp. 3			1	1													3								5
Fornax sp. 4							1	2																	3
Fornax sp. 5								1				1													2
Fornax sp. 6								1											1						2
Fornax sp. 7					1																				1
Fornax sp. 8								1																	1
Fornax sp. 9														1											1
Fornax sp. 10																		1							1
Fornax sp. 11																1			2						3
Plesiofornax sp. 1													1	1			2				1			1	6
Serrifornax sp. 1										1															1
Dromaeolus sp. 1											1							1							2
Dromaeolus sp. 2			1										2				1								4
Dromaeolus sp. 3						1												1							2
Dromaeolus sp. 4																					1				1
Dromaeolus sp. 5																					1				1
Dromaeolus sp. 6		1				1									1		1				1		2	1	8
Dromaeolus sp. 7																								1	1
Dromaeolus sp. 8				1																					1
Dromaeolus sp. 9							1																		1
Dyscharachthis sp. 1								1												1					2
Microrhagus sp. 1				1		1																			2
Microrhagus sp. 2		1					2		1										1						5
Microrhagus sp. 3						1	1										1								3
Microrhagus sp. 4								1													1				2
Microrhagus sp. 5									2		1						1								4
Microrhagus sp. 6											1				1										2
Microrhagus sp. 7																				1					1
Rhagomicrus sp. 1													1											1	2
Maelodrus sp. 1																	1								1
Spinifornax sp. 1									1																1
Heterotaxis sp. 1									1																1
																										TOTAL
																										141
